# Supplementary material
Source: publisher site journal article supplement (https://www.spandidos-publications.com/4086/downloadSupplementary)
Supplement: Supplementary file 1 [file downloadSupplementary]

Table SI. Changes of physiological parameters and incidence of adverse reactions.

| Groups     | T   | HR  | RR  | BP  | Blood glucose | Arrhythmias | Cardiac ischemia |
|------------|-----|-----|-----|-----|---------------|-------------|------------------|
| D3 alone   | 3 ↑ | 6 ↑ | 4 ↑ | 5 ↑ | 2 ↑           | 4           | 2                |
| N=40       | 1 ↓ | 1 ↓ | 1 ↓ | 1 ↓ | 1 ↓           |             |                  |
| D3+Calcium | 2 ↑ | 4 ↑ | 3 ↑ | 4 ↑ | 3 ↑           | 3           | 2                |
| N=36       |     | 2 ↓ |     | 1 ↓ |               |             |                  |

Data are the number of patients with adverse reactions. All physiological parameters were daily measured and recorded. Arrhythmias and cardiac ischemia were diagnosed via electrocardiogram recordings, manifested as premature beats or ST section depression, and those asymptomatic reactions did not require drug intervention. T, body temperature; HR heart rate; RR respiratory rate, BP blood pressure; ↑↓ increase or decrease, respectively, compared with the corresponding normal values (unless specifically defined otherwise) and alterations over 1 day; ↑↓ in T refers to a change >1°C; ↑↓ in HR refers to a change >10 times/min; ↑↓ in RR refers to a change >6 times/min; ↑↓ in BP refers to a change >15 mmHg; ↑↓ in blood glucose refers to a change >3 mmol/l.

Table SII. Determination of serum biochemistry before and after treatments.

| Biochemistry parameters | D3 alone (n=18) |           | P value | D3+Calcium (n=17) |           | P-value |
|-------------------------|-----------------|-----------|---------|-------------------|-----------|---------|
|                         | Before          | After     |         | Before            | After     |         |
| AST                     | 22.9±7.5        | 23.2±7.2  | 0.874   | 21.5±8.8          | 21.3±7.2  | 0.933   |
| ALT                     | 19.7±10.7       | 21.2±9.0  | 0.922   | 21.0±11.4         | 21.6±6.8  | 0.973   |
| CK                      | 91.5±44.3       | 90.2±36.7 | 0.464   | 84.4±42.9         | 84.8±38.7 | 0.769   |
| TP                      | 74±6.7          | 72.3±6.8  | 0.652   | 69.3±5.5          | 68.7±6.1  | 0.856   |
| BUN                     | 5.0±1.8         | 5.5±1.6   | 0.409   | 4.8±1.7           | 5.17±1.5  | 0.460   |

ALT, alanine aminotransferase; AST, aspartate aminotransferase; CK, creatine kinase; TP, total protein; BUN, urea nitrogen.
